# Supplementary material for: Sexual Violence at University: Are Indigenous Students More at Risk?
Source: PubMed Central journal article supplement — J Interpers Violence. 2021 Jun 10;37(17-18):NP16534–55. doi: 10.1177/08862605211021990 (PMC9465539; doi:10.1177/08862605211021990), 2021-06-10
Supplement: sj-pdf-1-JIV-10.1177_08862605211021990.pdf [file sj-pdf-1-JIV-10.1177_08862605211021990.pdf]

## Supplementary data

Table S1  
*Correlations between variables*

| Variable                         | 1 | 2            | 3            | 4            | 5            | 6            | 7            | 8             | 9            | 10            | 11            | 12            | 13            |
|----------------------------------|---|--------------|--------------|--------------|--------------|--------------|--------------|---------------|--------------|---------------|---------------|---------------|---------------|
| 1. At least one form of SV 12 m  | - | <b>0,813</b> | <b>0,936</b> | <b>0,776</b> | <b>0,602</b> | <b>0,558</b> | <b>0,038</b> | <b>-0,101</b> | <b>0,112</b> | <b>0,080</b>  | <b>-0,077</b> | <b>0,113</b>  | <b>0,148</b>  |
| 2. Sexual harassment 12 m        |   | -            | <b>0,761</b> | <b>0,934</b> | <b>0,489</b> | <b>0,624</b> | <b>0,028</b> | <b>-0,108</b> | <b>0,102</b> | <b>0,083</b>  | <b>0,038</b>  | <b>0,109</b>  | <b>0,158</b>  |
| 3. Unwanted sexual behavior 12 m |   |              | -            | <b>0,814</b> | <b>0,464</b> | <b>0,451</b> | <b>0,036</b> | <b>-0,103</b> | <b>0,111</b> | <b>0,078</b>  | <b>-0,077</b> | <b>0,118</b>  | <b>0,145</b>  |
| 4. At least one form of SV STU   |   |              |              | -            | <b>0,396</b> | <b>0,500</b> | <b>0,030</b> | <b>-0,112</b> | <b>0,101</b> | <b>0,083</b>  | <b>0,039</b>  | <b>0,114</b>  | <b>0,155</b>  |
| 5. Sexual harassment STU         |   |              |              |              | -            | <b>0,784</b> | 0,020        | <b>-0,089</b> | <b>0,069</b> | <b>0,063</b>  | <b>-0,063</b> | <b>0,095</b>  | <b>0,129</b>  |
| 6. Unwanted sexual behavior STU  |   |              |              |              |              | -            | 0,022        | <b>-0,107</b> | <b>0,073</b> | <b>0,067</b>  | <b>0,031</b>  | <b>0,108</b>  | <b>0,167</b>  |
| 7. Indigenous                    |   |              |              |              |              |              | -            | 0,002         | -0,002       | <b>0,054</b>  | 0,001         | 0,021         | 0,000         |
| 8. Women                         |   |              |              |              |              |              |              | -             | <b>0,033</b> | <b>-0,032</b> | 0,008         | <b>-0,183</b> | <b>-0,174</b> |
| 9. Heterosexual                  |   |              |              |              |              |              |              |               | -            | <b>0,102</b>  | <b>-0,033</b> | <b>0,073</b>  | <b>0,105</b>  |
| 10. Disability                   |   |              |              |              |              |              |              |               |              | -             | <b>-0,054</b> | <b>0,109</b>  | <b>0,105</b>  |
| 11. Undergraduate                |   |              |              |              |              |              |              |               |              |               | -             | 0,010         | 0,024         |
| 12. Sexual aggression before 18  |   |              |              |              |              |              |              |               |              |               |               | -             | <b>0,262</b>  |
| 13. Sexual aggression after 18   |   |              |              |              |              |              |              |               |              |               |               |               | -             |

Note. Correlations in bold are significant at  $p < .05$ ; SV = sexual violence; 12m = in the last 12 months; STU = since starting university.
